# Supplementary material
Source: publisher site journal article supplement (https://www.dovepress.com/article/432697)
Supplement: Supplementary file 1 [file get_supplementary_file.php]

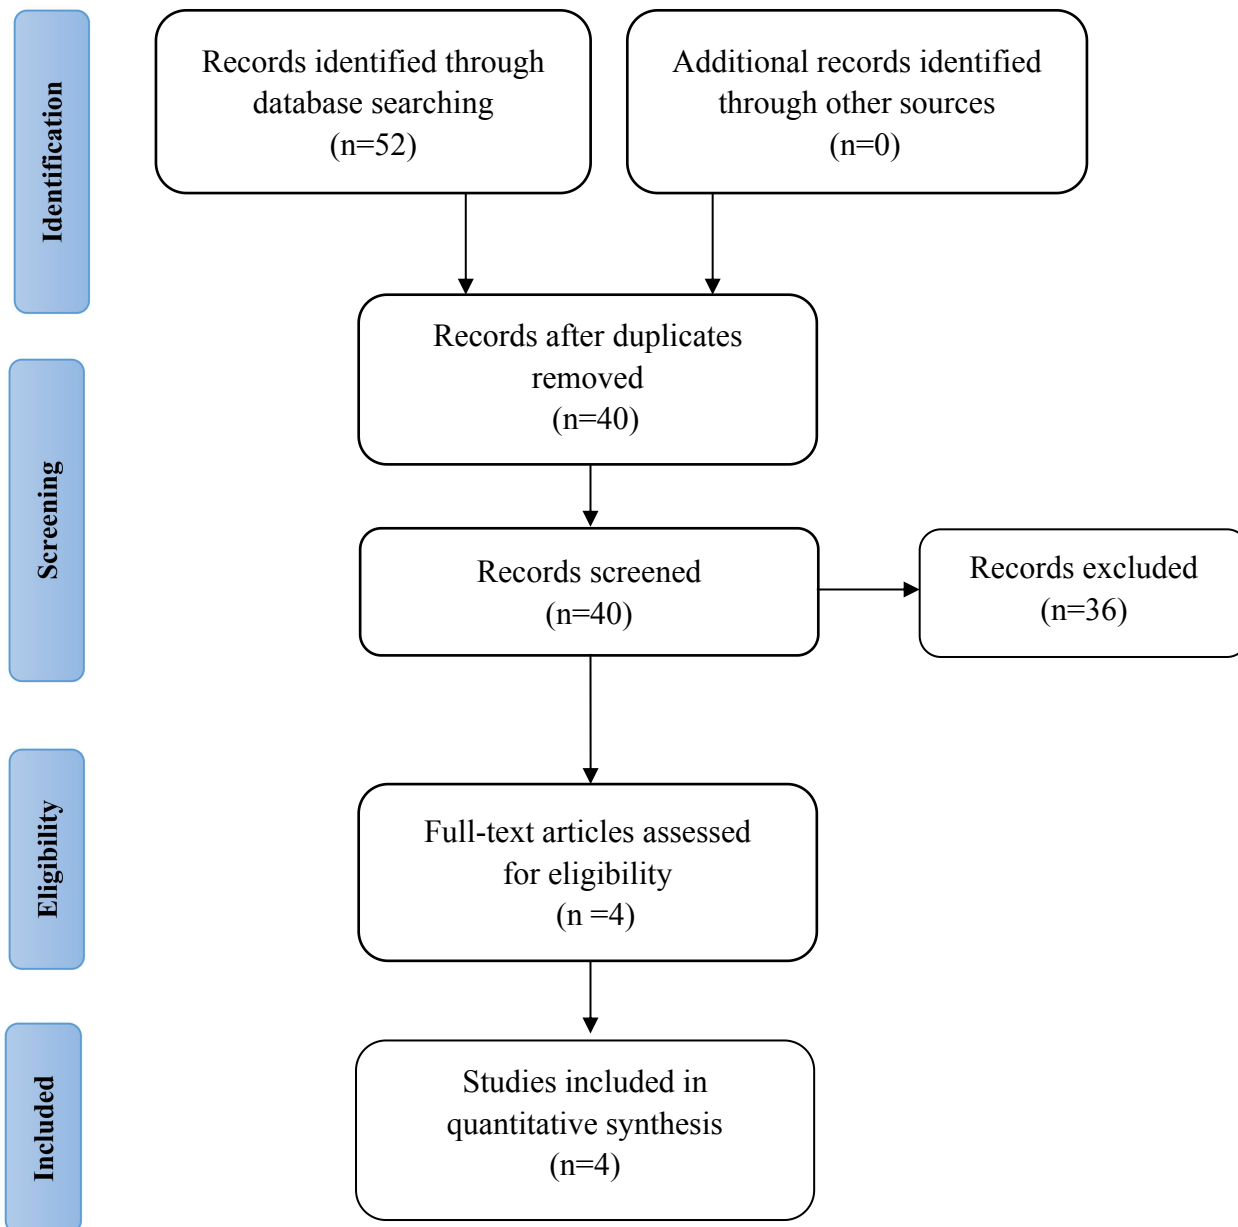

**Fig. S1.** Flow diagram of the cases of the misdiagnosis between *Talaromyces marneffe* and lymphoma.

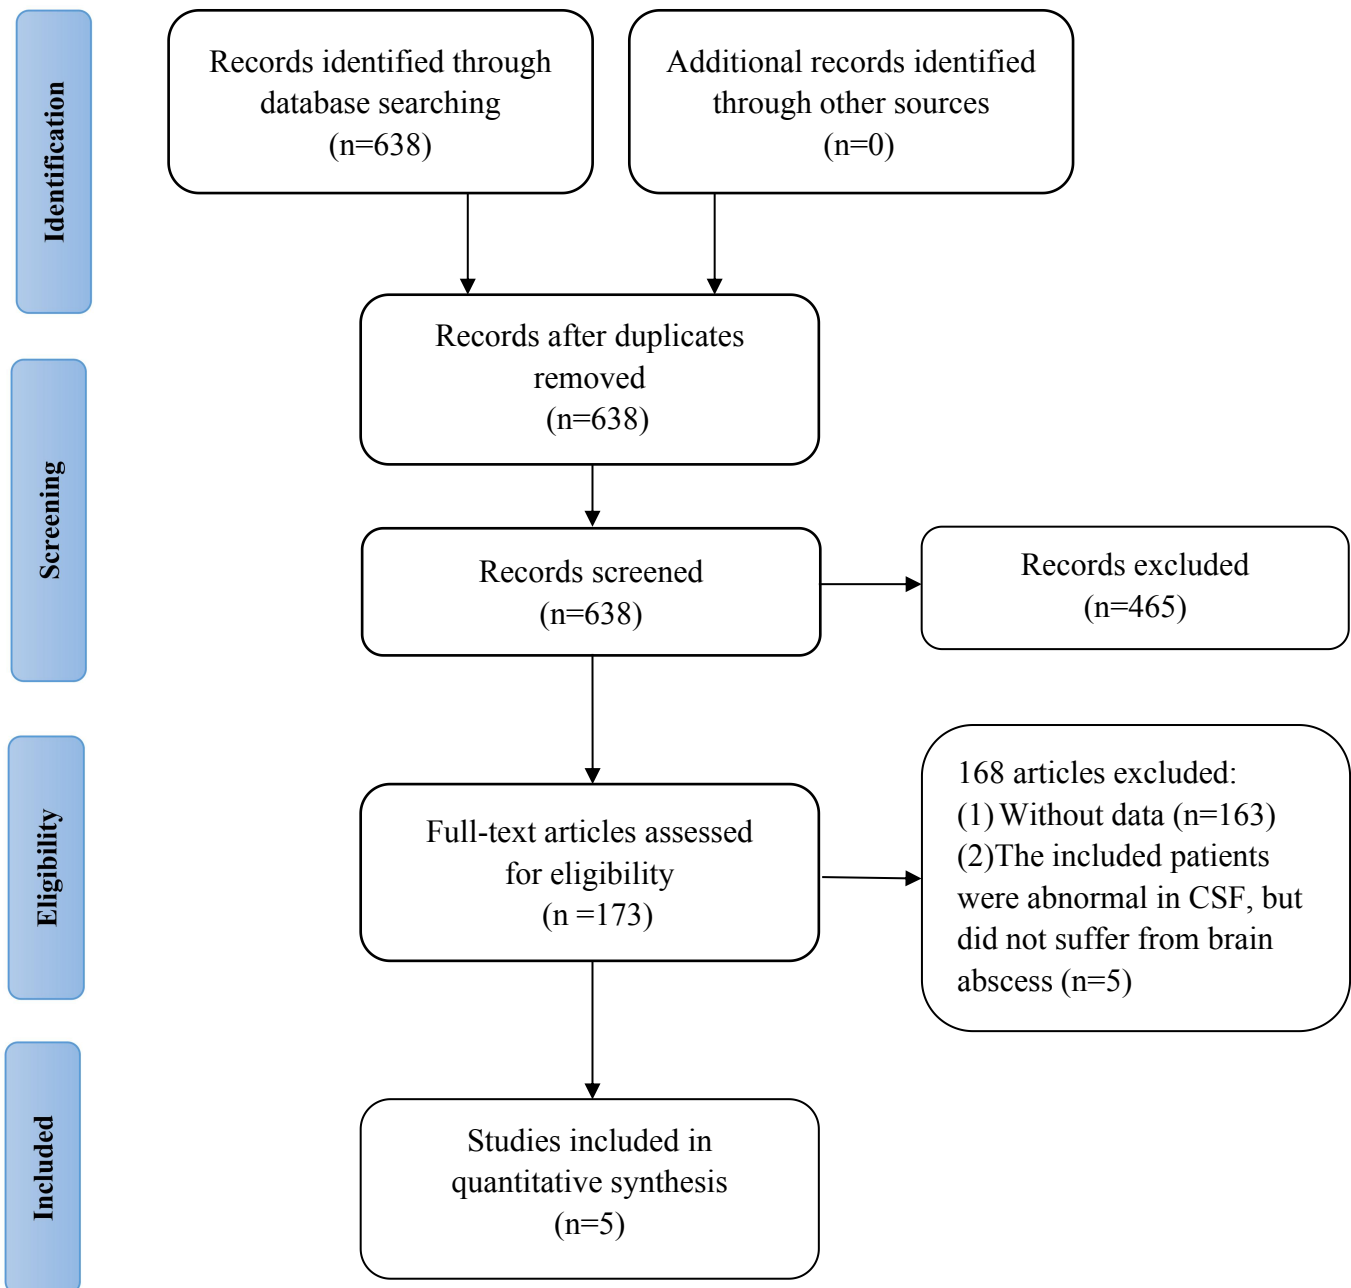

**Fig. S2.** Flow diagram of cases infected with *Talaromyces marneffe* manifested as brain mass. CSF: Cerebrospinal Fluid.
